# Supplementary material for: Early Pupillometry Assessment in Traumatic Brain Injury Patients: A Retrospective Study
Source: MDPI journal article supplement (doi:10.3390/brainsci11121657), 2021-12-20
Supplement: s1 [file s1]

**Supplemental Figure S1.** Flow-chart of the study.

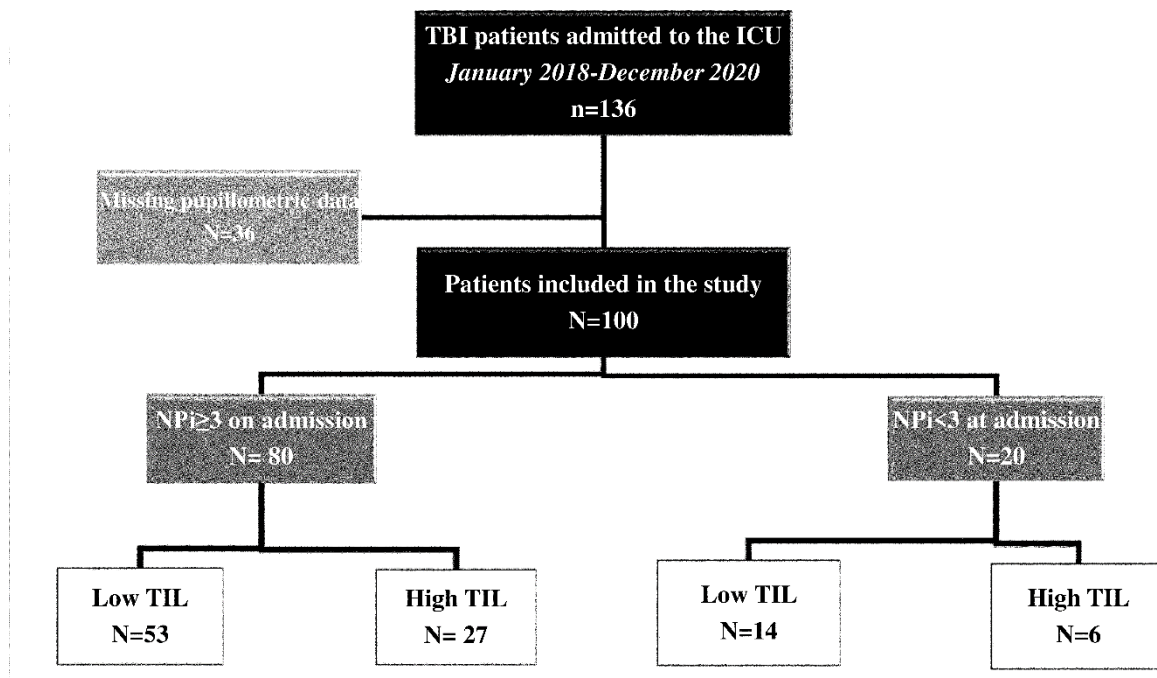

NPi = neurological pupil index; TIL = Therapeutic Intensity Level.

**Supplemental Table S1.** Characteristics of the study population, according to hospital mortality. Data are presented as count (%) or median (25<sup>th</sup>–75<sup>th</sup> percentiles).

|                                          | ALL<br>(n = 100) | Non-Survivors<br>(n = 29) | Survivors<br>(n = 71) | <i>p value</i> |
|------------------------------------------|------------------|---------------------------|-----------------------|----------------|
| Age, (years)                             | 48 [34–69]       | 67 [43–75]                | 43 [32–62]            | 0.002          |
| Male Gender, n (%)                       | 73 (73)          | 19 (66)                   | 54 (76)               | 0.32           |
| Mechanism of Trauma n (%)                |                  |                           |                       | 0.17           |
| <i>Fall</i>                              | 64 (64)          | 23 (79)                   | 41 (58)               |                |
| <i>Car accident</i>                      | 24 (24)          | 4 (14)                    | 20 (28)               |                |
| <i>Aggression</i>                        | 9 (9)            | 1 (3)                     | 8 (11)                |                |
| <i>Other</i>                             | 3 (3)            | 1 (3)                     | 2 (3)                 |                |
| Polytrauma, n (%)                        | 38 (38)          | 8 (28)                    | 30 (42)               | 0.18           |
| Glasgow Coma Scale GCS on admission      | 11 [6–15]        | 6 [3–12]                  | 13 [7–15]             | <0.001         |
| SOFA Score on admission                  | 6 [2–8]          | 8 [7–12]                  | 4 [1–7]               | <0.001         |
| Marshall Score                           | 5 [2–5]          | 5 [4–5]                   | 4 [2–5]               | 0.06           |
| Neurological Pupil Index                 |                  |                           |                       |                |
| <i>Worst NPI at admission</i>            | 4.2 [3.2–4.5]    | 3.6 [1.1–4.4]             | 4.3 [3.6–4.6]         | 0.01           |
| <i>Average NPI at admission</i>          | 4.3 [3.4–4.7]    | 3.7 [2.1–4.4]             | 4.4 [3.8–4.7]         | 0.08           |
| <i>NPI &lt; 3, n (%)</i>                 | 20 (20)          | 9 (31)                    | 11 (15)               | 0.1            |
| <i>Worst size (max) on admission, mm</i> | 3.1 [2.4–4.2]    | 2.9 [2.4–4.1]             | 3.1 [2.4–4.2]         | 0.93           |
| <i>Worst CH (min) on admission, %</i>    | 16 [9–26]        | 14 [1.5–20]               | 16 [9–27]             | 0.09           |
| <b>Comorbidities</b>                     |                  |                           |                       |                |
| COPD/Asthma, n (%)                       | 8 (8)            | 3 (10)                    | 5 (7)                 | 0.69           |
| Chronic kidney disease, n (%)            | 7 (7)            | 4 (14)                    | 3 (4)                 | 0.19           |
| Cirrhosis, n (%)                         | 5 (5)            | 5 (17)                    | 0                     | 0.002          |
| Heart disease, n (%)                     | 24 (24)          | 12 (41)                   | 12 (17)               | 0.01           |
| Immunosuppression, n (%)                 | 1 (1)            | 1 (3)                     | 0                     | 0.29           |
| Previous neuro pathology, n (%)          | 19 (19)          | 9 (31)                    | 10 (14)               | 0.09           |
| Cancer, n (%)                            | 5 (5)            | 3 (10)                    | 2 (3)                 | 0.14           |
| Diabetes, n (%)                          | 12 (12)          | 4 (14)                    | 8 (11)                | 0.74           |
| AHT, n (%)                               | 25 (25)          | 14 (48)                   | 11 (16)               | 0.001          |
| Cataract, n (%)                          | 3 (3)            | 1 (3)                     | 2 (3)                 | 1              |
| Glaucoma, n (%)                          | 1 (1)            | 0                         | 1 (1)                 | 1              |
| Seizures, n (%)                          | 5 (5)            | 1 (3)                     | 4 (6)                 | 1              |
| Alcohol, n (%)                           | 40 (40)          | 12 (41)                   | 28 (39)               | 1              |
| Smoking, n (%)                           | 22 (22)          | 3 (10)                    | 19 (27)               | 0.11           |
| <b>ICU Therapies</b>                     |                  |                           |                       |                |
| Therapy Intensity Level (TIL-Basic)      | 2 [1–4]          | 1 [1–2]                   | 4 [2–4]               | <0.001         |
| Sedative drugs, n (%)                    | 68 (68)          | 28 (97)                   | 40 (56)               | <0.001         |
| Analgesic drugs, n (%)                   | 81 (81)          | 29 (100)                  | 52 (73)               | 0.001          |

|                                  |            |            |            |        |
|----------------------------------|------------|------------|------------|--------|
| Vasopressor drugs, n (%)         | 56 (56)    | 24 (83)    | 32 (45)    | <0.001 |
| Inotropes drugs, n (%)           | 2 (2)      | 2 (7)      | 0          | 0.08   |
| Mechanical ventilation, n (%)    | 69 (69)    | 27 (93)    | 42 (59)    | 0.002  |
| ECMO, n (%)                      | 1 (1)      | 1 (3)      | 0          | 0.29   |
| ICP Monitoring, n (%)            | 45 (45)    | 18 (62)    | 27 (38)    | 0.04   |
| Osmotic drugs, n (%)             | 46 (46)    | 20 (69)    | 26 (37)    | 0.004  |
| Decompressive craniectomy, n (%) | 29 (29)    | 14 (48)    | 15 (21)    | 0.009  |
| Barbituric, n (%)                | 17 (17)    | 8 (28)     | 9 (13)     | 0.08   |
| Hypothermia, n (%)               | 6 (6)      | 4 (14)     | 2 (3)      | 0.06   |
| <b>Outcome Variables</b>         |            |            |            |        |
| ICU stay, days                   | 6 [3–17]   | 9 [3–21]   | 5 [3–14]   | 0.18   |
| Hospital stay, days              | 16 [8–43]  | 11 [4–24]  | 19 [10–48] | 0.01   |
| IMPACT Mortality, %              | 34 [15–50] | 49 [41–63] | 20 [9–37]  | <0.001 |
| IMPACT Unfavourable Outcome, %   | 50 [24–71] | 71 [58–84] | 34 [17–53] | <0.001 |

UO = Unfavorable Outcome; FO = Favorable Outcome; NPI = Neurological Pupil Index; SOFA = Sequential Organ Failure Assessment; CT = Computed Tomography; CH = Change (percentage of constriction); COPD = Chronic Obstructive Pulmonary Disease; AHT = Arterial Hypertension; ECMO = Extracorporeal Membrane Oxygenation; ICP = Intracranial Pressure; ICU = Intensive Care Unit; IMPACT = International Mission for Prognosis and Analysis of Clinical Trials in TBI.

**Supplemental Table S2.** ROC Curves according to prediction of hospital mortality

|                  | <b>AUC [IC 95%]</b> | <b><i>p value</i></b> |
|------------------|---------------------|-----------------------|
| Marshall score   | 0.67 [0.53–0.81]    | 0.03                  |
| TIL              | 0.62 [0.47–0.76]    | 0.15                  |
| TBI-IMPACT       | 0.85 [0.76–0.95]    | <0.001                |
| GCS on admission | 0.72 [0.62–0.82]    | 0.001                 |
| Worst NPI both   | 0.66 [0.54–0.78]    | 0.013                 |
| Average-NPI      | 0.67 [0.55–0.79]    | 0.008                 |
| Worst Size both  | 0.56 [0.41–0.71]    | 0.47                  |
| Worst CH both    | 0.61 [0.49–0.73]    | 0.096                 |

UO = Unfavourable Outcome; FO = Favourable Outcome; NPI = Neurological Pupil Index; CT = Computed Tomography; CH = Change (percentage of constriction); GCS = Glasgow Coma Scale; IMPACT = International Mission for Prognosis and Analysis of Clinical Trials in TBI; TIL = Therapy Intensity Level.

**Supplemental Table S3.** Characteristics of the study population, according to TIL-Basic. Data are presented as count (%) or median (25<sup>th</sup>–75<sup>th</sup> percentiles).

|                                          | ALL<br>(n = 100) | TIL 4<br>(n = 33) | TIL 1–3<br>(n = 67) | <i>p value</i> |
|------------------------------------------|------------------|-------------------|---------------------|----------------|
| Age, (years)                             | 48 [34–69]       | 42 [34–61]        | 49 [32–74]          | 0.26           |
| Male Gender, n (%)                       | 73 (73)          | 22 (67)           | 51 (76)             | 0.35           |
| Mechanism of Trauma, n (%)               |                  |                   |                     | 0.18           |
| <i>Fall</i>                              | 64 (64)          | 24 (73)           | 40 (60)             |                |
| <i>Car accident</i>                      | 24 (24)          | 6 (18)            | 18 (27)             |                |
| <i>Aggression</i>                        | 9 (9)            | 1 (3)             | 8 (12)              |                |
| <i>Other</i>                             | 3 (3)            | 2 (6)             | 1 (2)               |                |
| Polytrauma, n (%)                        | 38 (38)          | 12 (36)           | 26 (39)             | 0.83           |
| Glasgow Coma Scale GCS on admission      | 11 [6–15]        | 4 [3–9]           | 7 [4–10]            | <0.001         |
| SOFA Score                               | 6 [2–8]          | 8 [7–10]          | 7 [5–10]            | <0.001         |
| Marshall Score                           | 5 [2–5]          | 5 [5–5]           | 3 [2–5]             | 0.002          |
| Neurological Pupil Index                 |                  |                   |                     |                |
| <i>Worst NPI on admission</i>            | 4.2 [3.2–4.5]    | 3,8 [2.2–4.4]     | 4 [2.8–4.4]         | 0.05           |
| <i>Average NPI on admission</i>          | 4.3 [3.4–4.6]    | 3,9 [2.2–4.4]     | 4.25 [3.2–4.5]      | 0.04           |
| <i>NPI &lt; 3, n (%)</i>                 | 20 (20)          | 6 (18)            | 14 (21)             | 0.79           |
| <i>Worst size (max) on admission, mm</i> | 3.1 [2.4–4.2]    | 2.8 [2.3–4]       | 2.9 [2.3–3.9]       | 0.03           |
| <i>Worst CH (min) on admission, %</i>    | 16 [8.5–25.5]    | 11 [0–14]         | 14 [6–17]           | 0.002          |
| <b>Comorbidities</b>                     |                  |                   |                     |                |
| COPD/Asthma, n (%)                       | 8 (8)            | 2 (6)             | 6 (9)               | 0.72           |
| Chronic kidney disease, n (%)            | 7 (7)            | 2 (6)             | 5 (8)               | 1              |
| Cirrhosis, n (%)                         | 5 (5)            | 3 (9)             | 2 (3)               | 0.33           |
| Heart disease, n (%)                     | 24 (24)          | 7 (21)            | 17 (25)             | 0.81           |
| Immunosuppression, n (%)                 | 1 (1)            | 0                 | 1 (2)               | 1              |
| Previous neurological disease, n (%)     | 19 (19)          | 3 (9)             | 16 (24)             | 0.11           |
| Cancer, n (%)                            | 5 (5)            | 1(3)              | 4 (6)               | 0.66           |
| Diabetes, n (%)                          | 12 (12)          | 2 (6)             | 10 (15)             | 0.33           |
| HTA, n (%)                               | 25 (25)          | 6 (18)            | 19 (28)             | 0.33           |
| Cataract, n (%)                          | 3 (3)            | 0 (0)             | 3 (5)               | 0.55           |
| Glaucoma, n (%)                          | 1 (1)            | 0 (0)             | 1(1,5)              | 1              |
| Seizures, n (%)                          | 5 (5)            | 2 (6)             | 3 (4,5)             | 1              |
| Alcohol, n (%)                           | 40 (40)          | 15 (46)           | 25 (37)             | 0.52           |
| Smoking, n (%)                           | 22 (22)          | 7 (21)            | 15 (22)             | 1              |
| <b>ICU Therapies</b>                     |                  |                   |                     |                |
| Sedative drugs, n (%)                    | 68 (68)          | 33 (100)          | 35 (52)             | <0.001         |
| Analgesic drugs, n (%)                   | 81 (81)          | 32 (97)           | 49 (73)             | 0.005          |
| Vasopressor drugs, n (%)                 | 56 (56)          | 31 (94)           | 25 (37)             | <0.001         |

|                                  |            |            |            |        |
|----------------------------------|------------|------------|------------|--------|
| Inotropes drugs, n (%)           | 2 (2)      | 2 (6)      | 0 (0)      | 0.11   |
| Mechanical ventilation, n (%)    | 69 (69)    | 33 (100)   | 36 (54)    | <0.001 |
| ECMO, n (%)                      | 1 (1)      | 1 (3)      | 0 (0)      | 0.33   |
| ICP Monitoring, n (%)            | 45 (45)    | 32 (97)    | 13 (19)    | <0.001 |
| Osmotic drugs, n (%)             | 46 (46)    | 32 (97)    | 14 (21)    | <0.001 |
| Decompressive craniectomy, n (%) | 29 (29)    | 29 (88)    | 0 (0)      | <0.001 |
| Barbituric, n (%)                | 17 (17)    | 17 (52)    | 0 (0)      | <0.001 |
| Hypothermia, n (%)               | 6 (6)      | 6 (18)     | 0 (0)      | <0.001 |
| <b>Outcome Variables</b>         |            |            |            |        |
| ICU stay, days                   | 6 [3–17]   | 2 [3–7]    | 12 [4–23]  | <0.001 |
| Hospital stay, days              | 16 [8–43]  | 15 [8–43]  | 22 [9–42]  | 0.08   |
| ICU death, n (%)                 | 27 (27)    | 14 (42)    | 13 (19)    | 0.02   |
| Hospital death, n (%)            | 29 (29)    | 15 (46)    | 14 (21)    | 0.02   |
| IMPACT Mortality, %              | 34 [15–50] | 34 [27–55] | 21 [9–49]  | 0.16   |
| IMPACT Unfavourable Outcome, %   | 50 [24–72] | 50 [40–71] | 38 [18–71] | 0.31   |
| UO = GOS 1–3, n (%)              | 49 (49)    | 25 (76)    | 24 (36)    | <0.001 |
| Glasgow Outcome Scale            | 4 [1–4]    | 3 [1–4]    | 4 [3–4]    | <0.001 |

UO = Unfavourable Outcome; FO = Favourable Outcome; NPI = Neurological Pupil Index; SOFA = Sequential Organ Failure Assessment; CT = Computed Tomography; CH = Change (percentage of constriction); COPD = Chronic Obstructive Pulmonary Disease; AHT = Arterial Hypertension; ECMO = Extracorporeal Membrane Oxygenation; ICP = Intracranial Pressure; ICU = Intensive Care Unit; IMPACT = International Mission for Prognosis and Analysis of Clinical Trials in TBI.

**Supplemental Table S4.** ROC Curves according to the prediction of high TIL during ICU stay.

| <b>TIL 4 vs TIL 1–3</b> | <b>AUC [IC 95%]</b> | <b><i>p value</i></b> |
|-------------------------|---------------------|-----------------------|
| Marshall CT score       | 0.72 [0.58–0.87]    | 0.004                 |
| TBI-IMPACT Mortality    | 0.61 [0.46–0.76]    | 0.16                  |
| TBI-IMPACT UO           | 0.58 [0.43–0.73]    | 0.31                  |
| GCS                     | 0.73 [0.63–0.84]    | <0.001                |
| Worst NPI both          | 0.62 [0.51–0.73]    | 0.05                  |
| Average-NPI             | 0.62 [0.51–0.74]    | 0.04                  |
| Worst Size both         | 0.46 [0.31–0.61]    | 0.59                  |
| Worst CH both           | 0.69 [0.58–0.8]     | 0.002                 |

TIL = Therapy Intensity Level; UO = Unfavourable Outcome; NPI = Neurological Pupil Index; CT = Computed Tomography; CH = Change (percentage of constriction); GCS = Glasgow Coma Scale; IMPACT = International Mission for Prognosis and Analysis of Clinical Trials in TBI.
